# Supplementary material for: In the Cis-Element CACCC-box a Master Regulatory Element during Cardiovascular Disease? A Bioinformatics Approach from the Perspective of the Kruppel-like Family of Transcription Factors
Source: Preprints.org preprint supplement (doi:10.20944/preprints202403.0607.v1), 2024-03-11
Supplement: Supplementary file 1 [file Supplemental Table 1.docx]

Supplemental Table 1. Python analysis results of 3044hits from Signal Search Analysis Server resulted in 40 representative sequences.

| **Region** | **Sequence** |
| --- | --- |
| FP001062 | CAGTTAG-GGGTG-CGCTGGAGA-GGGTG-GGGCCCGACTCCGCCA-CACCC-CAACGGTCCTTCCCCCTCCTCACCACTCCCGCCCC-CACCC-CCAATGGATCTGGGACTGCCCCTTTAAGAGTAGTGGCCCCTCCTCCCTTCAGAGGAGGACCTATTAGAGCCTTTGCCCCGGCGTCGGTGACTCAGTGTTCGCGGGAGCGCCGCACCTACACCAGCCAACCCAGATCCCGAGGTCCGACAGCGCCCGGCCCAGATCCCCACGCCTGCCAGGAGCAAGCCGAGAGCCAGCCGGCCGGCGCACTCCGACTCCGAGCAGTCTCTGTCCTTCGACCCGAGCCCCGCGCCCTTTCCGGGACCCCTGCCCCGCGGGCAGCGCTGCCAACCTGCCGGCCATGGAGACCCCGTCCCAGCGGCGCGC-CACCC-GCAGCGGGGCGCAGGCCAGCTCCACTCCGCTG |
| FP001404 | AGCCGAGGTTCTGCTACTCCAGGAGCCGAGGTTCTAACGTGGTCTGCGTCCAGCGCCCC-CACCC-CTACTCC-CACCC-CTACCCC-CACCC-C-CACCC-TTCAACCCGCCCCCTACCCCCAGC-CACCC-CGTGGCCGCGAGCCAAGAGGTCCCTTTAAAGGCGCGAGTCCCGCCCCCACTGCTCATTAGGGCTTTCGATTGGCGGCTCCTGGGCGGGGCGGGGCCCGGCCTGGGCTCGGGGCTGGCTCGGGGCGGGCTCGGGGCCGGATCGGCCCCCGCCCCCTTTGTTCGCGCTGCGGCGGGAGGTGGCTGCC-GGGTG-GGAGGTGTGTGCGCGTGTGCCGCGCCGTAGGGAGCGGCGGGTCGCGCCGCCGGCTGTCAGCTAGCTCCGCGCCGCCGCCCGATGGCGCGAGGAGGCGCGCGGGCCCAGCCCCGGGGGGCCGGCCGC-GGGTG-AGCCCC |
| FP006896 | ACCCCCTCGGTAATCCCGTACTCCCTCTAGCGGCGGGCCACTGCAGCGTGGCCACCGCCCC-CACCC-CCATCCCCCATCCCCG-CACCC-CCCTC-CACCC-CCTAGCCCGCGGAGCACGCTGGGATTTGGCGCCCCCCTCCTCGGTGCAACCTATATAAGGCTCACAGTCTGCGCTCCTGGTACACGCGCTTCAACTTCGGTTGGTGTGTGTCGAAGAAACCTGACTGCGCCCTGAGGAGAACAGCGGAGAAGGTCCACCGAGCCTGGCGAAAGGTCCGCTGAGCGGGCTGTCGTCCGGAGCCACTCCGGGCTGCGGAG-CACCC-AGTGGAGACCGCGCCTGGCTCAGGTGTGGGACCCCATCCTTCCTGTCTTCGCAGAGGAGTCCTCGCGTGGTGAGTATGCGGTGAGGACGTTTTTTTTTTAAAGATCACGTTCATTCCCCGTGCTTATCGGG |
| FP009159 | GTCCCAACTGGGAGGGGCCCTGGCAGCATGAAACCCC-CACCC-CCACTCTCTGCGACGGCCCAGATGGAGGGCAGGAGGAACAGCGGTTCAGCCCTGGCTGGGGCTGCAGGGGCTG-GGGTG-TGTTACTCACTGGCACGATGGAGAACTGCATGAAGAGGCAGGTAAGTTCTGTGGCGGCCAGCACGTAGGTAAGCAAGATGACCGAGGACCGGCCTAGAGCGCTCATCCTGCCGGGGGACCGGCCCTGGTCCCTGGGAGCCCGAGCTCCCTGCATCCTGGACAGGCGCAGCAGGGAGACCCAGGAGAGATCCAAGCAGGAGGCTGGCGGAGCAGGGGGCAAAAGTCCAGTTGATCCGGGCAG-GGGTG-CTGAGTCACTGGGTCCCAGGCAG-CACCC-GCCTGGCCTTGCCTGCAAGAGAGGACAGCACTGCAGGACCCCCTCCCCAGTGGAGCT |
| FP009252 | GGTGAGTGTCAGGCCGGCGGCGGCCAGCGACGCGATCCCGCG-CACCC-CGTCGGGGGCCGTTAG-CACCC-TCGCGGGCGCTGCGCCCCTGCCGCCGCCCCGGGGGCAACCCGGCCGCCGAAGAACCCTGCCCGACGTGCCCGCTGCCGGCCTTAAAGGGCCCGTGACCGCTCCCTGCCCC-CACCC-GGGCCGTGGGGAGGCTGCGCCCCTTAAAGGCGCCGCGCCCGTCCGCCCCCATCCTCCTCGCGGGGGCTGCCGCTGCGGGCTAGGGCAGGCAGAGGTGCTGCAGGAGCCCTTAAAGGGGCCGGGAAAGTGTTCGCTGGAGTACCCACCGCCCTTCCGCGGGCATCGCTACCTGGCGGGGGGAGGGGGCAGCTAGCTGCCTCTTAAAGGGATAGCTCTGCCCTTGGGGGCAGTGACTCGGCCGAAGAGGACTCCTAGATGTGTCCCCGGG |
| FP010074 | GGCTGGGACTGGGGTCCCAGGAGGCCCTACCCC-CACCC-TGTGAGAGGTAG-GGGTG-TGGGGAAGGCAGCAGGGGAGGATGGCAATAAGAGGGAGGCTGGGATGAGATCTCAAGCTCTGGGGTCGGTACTTCAGAGGGAAAGGAAGAGATTATAAAGGAAGGAAAGAGTAGGGAAGAGAAGAAAATGAGAATTCCTATGTAGCAGGCTCTGTGCTGGGCACTGCACCTGCAGTCCGTTTTTTTTGTTGTTGTTGTTAGAGTCTTGCTCGGTCGTCCAGATGGAGTACAGTGGCACCATCTCCACTCACTGCAGCCTAGACCTCCCGGGTTCGAGAGATTCTCGTGCCTCAGCCTCCTGAGTAGCTGGAATCACAGGCATGCACCACCACGCCCAGCCTGTCATTGATTTTTACCAAAATTTTCCACCGTTGGAAGGGACATTAGGCTTGGCGA |
| FP017185 | AGACGGGTTTTAACCATGTTGGCGAGGATGGTCTCGATCTCTTGGCCACATGATC-CACCC-GCCTCCGCCCCCCAAAGTGCTGGGATTACAGGCGTGAGCCACCGCGCCCGGTCATGGAGTGAGTTTTGAAGGCTGACTTTATTTGAGGTATTTGAGTCCTGGTGGGGGGGAACCCACACACAGAGAGGAGGGATTCCAAAGTCGTTAATGGGGACCTGGGAAGGAGCATAGGACAGGGCAAGGCGGGATAAGGAGGGGCACCACAGCCCTTAAGGCACGAGGGAACCTCACTGCGCATGCTCCTTTGGTGCCCACCTCAGTGCGCATGTTCACTGGGCGTCTTCCCATCGGCCCCTTCGCCAGTGTGGGGAACGCGGCGGAGCTGTGAGCCGGCGACTCGGGTCCCTGAGGTCTGGATTCTTTCTCCGCTACTGAGACACGGCGGGTAGGT |
| FP013339 | GCCCTTCCTGCCTTCTTGGCCGGGAGGAAGTAGTGCAGCCCCAAAATCAGAGGCC-CACCC-AGCGCCCCAGAGGGCCTGGTCAGAGGTCCTCCCTGCTCCCCAGGAGGGCAGGCGCCCCAGATCCTCTCCCCTCCTTCCTCGCTGGCCGCAGATAAGCCCCAGGGCCCCAGCCTGGCACAGACTGTGGGCACCAGTGGCTTCTGTGCAAGGACTGAAGT-CACCC-AGCAGGCTGCCCTTCCACAGGCGAGATCACCAGGTTCCTGTGGCCCAAAGAGGTGGAGCTGCTGCTGAAAACCTGGCTACCCGGGGA-GGGTG-CTGTGCAAAACCATGTCCTGGTATGGGGCAGGGGACAGAGCCGGGGAGGCGGCTGTGGCCCCACAGAAAGAGCCTCTTGCTCTGCCCAGGATATCAGACTGTCTTTCCCCAGGCACTGCTACGATGGAGAGCCTAC |
| FP016445 | GGCCCAGCTCAGGGCACCGA-GGGTG-GCCGGGTCTGCTGTCAGGTGAGGAGCT-GGGTG-CCTCTGCCGGGGCCCTGGCCCAAGGAGAGTGTCACGGGGAAGGCTGCAGCATGGCC-CACCC-AGGACTTCTGGGGATGAGTCTTGTTTTTCGTTTTTATAGAAACACAGATCTTTGTCCTAACCACAAGGTTCCCCTTTGGTTTATGTGGTTTCCTCTGGTTCCTGCCACCACCACCTCCCCAGGCCGGGGCCTTCCCATCCCTGCCCAGTGGGGAGTGGGAGGAAGAGCCTGGGACAGTGGCCATACGTCCCGGGCTGATTTCTGGATTGGGGGTTCTGGGGACCAGGGAGGTGCAGGTGTCTGCAGTGTCAGAGGAGCCGCTGGGCTCGCCCAGGTGTTGCCTGAAGCCCTCCGTGGCCTCTTGCCCCTTGGACTCCTGACAGGAGGGACACC |
| FP000345 | CGTTTT-CACCC-TGGAAAGGAGTTTGGGTTTTCAAGTGTGACGAGGCGCTATTAAAGAGTTTTAAACATGGAAATTACTCGATCTGATGTTTGTGTAGTGTCCTGTTTGTTAGTCATCTTTTCCAAACTATAATACATTTTTTTTTTCCTAAAAATGGTCGTTAAAGCAGCCTAGGACTTAGGTCAATTGCGGTGGTCACTTGACCGCCTGTGAGGAGGCGGCGCGTG-GGGTG-GATCGGACTGGGCGTGGCGGGGGCTCAGGAAGGA-GGGTG-GCCCTACCCCAGCGGGCTCGGCTCGGGGCCTCCGCGGCAGTTCGGGGTCCTT-CACCC-GCCGGCTCCAGGTAGGCTACTCCTCAGGTAAGCCCCGCCGCCAGCCGCGACGTCGTCGCAGACAGGCACCGCCCCCACTCGTGCGGCGCGAGTAGTCCTGCCCCTCCGCGTTGTCTCCGGCCG |
| FP010429 | CTGCAGGAGAGTGGCTTTTATTAAAGCTCTTTTGCTTCTTAGAGAATGTTATCACCACTTAACATCCTCTGCCTCCAATTTAGTGCATTCTTTAAGTCCAGAAA-CACCC-AGAGTAACTGGCTTTTCTTGTTCTCCCTGTTCTGGGAAGTATGAAGGACTGCCCGGAAAAGAGTACAGGGAGGGGGGGATTCTTGATCCATGCACAGCGATGTGAGCTGAGGTGCAGGCACCAGACCTAGGAATTCCTAGAAAAATAGTCAGGAAGCATTTAGACACATCAAATGTTAAACGAGTCCTGATTATGATGATAATGATGATGATTTTGGTGGTTGCAATAGCAAAGCCTTAAGTATGAAGGAGACTTGCCAGCTGGAAATACAGGTCGGTAGCAGCATTAAGTATCTAGAGGAGCTGCAAATATTATTTTTTTGTGTGCTCATTTTATTTCTTT |
| FP009059 | ATGCAGATTTCTCTGAGCTCTTTAGCGCCCCGAGAAGGGGGAGAAAAACAGGATATTTCAGGCAAACAAATGAAAGAAGTGCTGCCCTGAAAGG-GGGTG-GTGGTGGGGAG-CACCC-CCAAGCTGCTCGCAAGTTCTGATTGGACGCAAGCATTAAACCGGGAGGGCTTTGTGGTCCTGGGTCAGTGTGTGTTTTTTGAGATTTCAATTTGTTGAGGAATTTCCCCCTAGCCTTGACCCCTTGACAGCTCCCGCTCCTACTCAGTGCTGGGGAGAAGTAGGGAGGCCTTAAGCGAAGAGATGGGTCTGCACTTTGGAGGAGCCGGACACTGTTGACTTTCCTGATGTGAAATCTACCCAGGAACAAAACACCAGGTGATCCCAGTGGCCGAGCCAGCAGTGGACAGAT-CACCC-CTTAGGTGGAAGCCCAAAGCGGAGGGCACTGTATTGGTCT |
| FP005350 | CTCAGAGCTGAGGTGGGAGATCTGCTCTTCCAGCCCGCCTCTCCTCCTCCAGCTCCCCAGCTCCACTCAAATTCAGCTCCCCTCCCCCCTGCC-CACCC-CCGCCACTCGGTGACTAAGAACTGCTGCAAGCAGGCAAACCTCCGAGCAGTTTTTAAGAGGCTGGAAGGAGACATAAGAGACTTCAGCTGCTGCATTCCAAGCCCTGGGTCTACCTTGGAGACAGGACAGCACAGACTTACTCTCCACAAAGGGACTTCTGGGTCATGGGGCCCAAGACACTCCCACAGCTCGCTGGGAAATGGCAAGTGCTGTGCATGTTGTCCTTGTGCTGCTGGGGCT-GGGTG-TCTGGGCAGCTTCGTTACTCAGTGGTGGAGGAGTCTGAGCCGGGGACGCTGGTGGGGAATGTTGCTCAGGATCTGGGCTTAAAGATGACAGATCTGTTGAGCCGGCG |
| FP008185 | GATTTGAGGCATTGTCATCCCCCG-CACCC-CTCCCCACGTGGCCTTCTGGCACGAGCCGCTGGCTCGCCGCCTCATTTACATCAGAAAGC-GGGTG-CCGGCCAATAGGCGCGCAGCCTCGCGCCAGCTGGCGGCGCCG-CACCC-ACCAGCCTATATAAGGGCGCGCAGCGTAGTAGGGGCGCACTCGCTGGTGGTGGGCGCGCCGTGCTGAGCTCTGGCTGTCAGTGTGTTCGCCCGCGTCCCCTCCGCGCTCTCCGCTTGTGGATAACTAGCTGCTGGTTGATCGCACTATGACTCTGGAAGAAGTCCGCGGCCAGGACACAGTTCCGGAAAGCACAGCCAGGTGGGTTTCAGGGCGCTGAGAAAGCCGCTGGTCGGTCGGCGACCGTCAGGGTTTTCCA-GGGTG-GGAATCCGCGGGGTAGGAGGGGAGCGCGGGGGTCCGGGCGCCAGATCC |
| FP009599 | CCACAGGACCTGGGCACTGGACCTTATGATGTGCTTCTCTGGAGTGAAGACTGGCTGTCACCTCAGCCCCCTCTCCTTTCTTCTGCTGCCATATCATTCTTCACATGCCTACCAGCCCCCTGGAATCTGCCCCTG-CACCC-TCATCCCTTATATATTTTGCAGAGAGCGTTTAGAGGACTGGAAGTGTGGCATGTAATGGTATCTCTGTTTC-CACCC-CGCAGCCCACCTTGGGACACCTTGACTCCAAGCCCAGCAGTAAGTCCAACATGATTCGGGGCCGCAACTCAGCCACCTCTGCTGATGAGCAGCCCCACATTGGAAACTACCGGCTCCTCAAGACCATTGGCAAGGGTAATTTTGCCAAGGTGAAGTTGGCCCGACACATCCTGACTGGGAAAGAGGTGAGCACTGGGACTGGGGACATGGCAGCACCTCCCAGCCCTGTTGACAC |
| FP003211 | TGGACTGTTACAATATTCACTGGCCTATCAGAAGAGGTCAGTTAAATATT-CACCC-AGGCCCTGGGGGCTCTCTTACAGCTGTTCTGGCAGATATTGAAGTAATATGGTCTCATGCGATACAAAAATACTTGGAAATCCCACTGAAAGATTTAAAGGTGAGCTAAAATCCTCAGTTATTTGGATTGTTTTTAAGATTCTTGGTCAATGAAAGTACACGTTACCGAGTTGTTTGTAATATAGTGTCCTTCTTGAAACATTCTTGACCTTCA-GGGTG-AGGATTCTTGGTGGCATGAGGATGTCTTTTCTTCTTCACTTAATTCCCTTCTGGTGCTTTTTTTCTTTCTCTGTTTCTTTGGTGTCTCTATTACTCGAATCAGCAAGCTTGCTCATTTTTGTCTTCTCTTTGGACCTTACTGACACATCAGTTGTCTTATTTTTGATTTTACAAGTT |
| FP003847 | CTTTCTTAAAGGAGGAGCTTTCTCCTCTCACCTCAAGGACTGTTATTTATTTGTCTGCGCTACTCTTTCGACGTTTCCATTCTCTTGGTCCTCAAGATGTGAAT-CACCC-ATTTTTTCCGTAGGGGGGAAGACGGCGTATCTCTGGCCCTTTAAATAGGGGCGTGGTGAAGAGGCGCGGACCGCCCAGGAGGGGGAGCAGTGCGAGGAGGAAAGCGGAAGCGCTGCCCGCAGTGGTAGGTAGTGCGCGTGCGTGAGGCTAGAGCAGT-GGGTG-CGGTCACGTGGGCCGGCGGTCCACGGCCGGAATGGCAGCAAGCTCAGGTAACGAGTTTCCAGAGAGCGGGCCCGTGGAAGGAGACAGGATTGAGGGGCCGTATTCAGGGTAGGAGGAGAGCGCGCGACAGGTCTCTGAGCCTCGGCGTCTCCTCCCCGCGCGACAGCGGCGGGACCTCGG |
| FP014009 | CCGGGTTTCCTGGGCTACTACGATGGCGATGAGTTTCGAGTGGCCGTGGCAGTATCGCTTCC-CACCC-TTCTTTACGTGAGGCTCAGACCCCAAGAAGCACCGCTGTGCCTCCCTCCCCTCCCCCGGACCCTGGGCTCAGCCCTGATGCTTCATATGGGGAGGGGGAGAAAAGACCCGTCGGCCAA-CACCC-TCAGTCCCTTACTTTCTTCCTGAAATGCGTCCCGGGCAAGTGCTGCCTCCCGCCCTCTAATTCTGCGCCCCACTCCCTT-CACCC-GGCAGGTTACAACCGAATGTGGACACTCGGCAGAAGCAGCTGGCCGCCTGGTGCTCGCTGGTCCTGTCCTTCTGCCGCCTGCACAAACAGTCCAGCATGACGGTGATGGAAGCTCAGGAGAGCCCGCTCTTCAACAACGTCAAGCTACAGCGTATCCTCCCTCAGGCTCTTCCACAG |
| FP007067 | ATGGGGAGTGTAAAGAGGCACTAGCAAAGTCCGAGATGAATGTGAATATGAAGTATCAGCTTCCCAACTTCACCGCGGAAA-CACCC-ATCCAGAATGTCATTCTACATGAGCATCACATTTTCCTTGGTGCCACTAACTACATTTATGTTTTAAATGAGGAAGACCTTCAGAAGGTTGCTGAGTACAAGACTGGGCCTGTGCTGGAA-CACCC-AGATTGTTTCCCATGTCAGGACTGCAGCAGCAAAGCCAATTTATCAGGAGGTGTTTGGAAAGATAACATCAACATGGCTCTAGTTGTCGACACCTACTATGATGATCAACTCATTAGCTGTGGCAGCGTCAACAGAGGGACCTGCCAGCGACATGTCTTTCCCCACAATCATACTGCTGACATACAGTCGGAGGTTCACTGCATATTCTCCCCACAGATAGAAGAGCCCAGCCAGTGTCC |
| FP002937 | GTTCAGTTCTCTACAGATTTGCTCTTGGGTTTATTATCTGCCCCTC-CACCC-CTGA-GGGTG-TCAGTGCTGTGAGGACGCTGGGAACCTGTCTTGCTGGCTGATAAACCCCTGGTTCCTAGAGGGGCT-GGGTG-CAGAGGAGGCGTTCCTTTAGAAATGGGGCAGGCTTGGGGACCACTGCTGTGGTAACGAGTCCTGCTGTCCCTCTGTCACTGCCCTATGGGGCTGCGCTTTAGGCTGGGAGTCGGAGAAGGAGCTCTTGCCTGTGACTTTGGGGAGCACGCTGTCTATAAGAGTCAGGTACGGCCACTGGGTCACAAGTGGGGCTACAGGCACTGGGGACTTGGGCCA-GGGTG-GAGGAGGGAGGAGGCATGAGGACTGGTGAGAAGGTGGCATTTGAGTGGCTTGTGCAAGATGAGAGGGGAGAAGAGCCCTTGGGGGAGTTCAGGCCTAA |
| FP013104 | CCGT-CACCC-CCCATCATACCTCC-CACCC-CCTCCGGGAAGGGAAATTACATTTCCCCATTTTAGCAAG-GGGTG-GCGAGAGGGAAGAATGAGTGAACACAAAGCTGAAAGTACAAGCAGGACGGAAAGTGAAACCGGGCACAGCCCCCAGTATAAGACCCCCCCTACCCAGGAGATGGCTGACCAAAGAGGCTGGGCCCCGCCATGGGCCAGACGGCAGGCGACCTTGGCTGGCGTGAGTTTGAAGCCAG-GGGTG-GGGGGCTTGGTTGAGTTTGGGCAGAGAATGGACGAGCTTGGCTGGTGCAGATGGGGGGTCGAGAGCTGAGAGCAGCAACTTGGCCAAGACTGAGGATTCGGCTGGCTGCTGCATGGGAAGGGAGGCTGGCATGACT-GGGTG-GGGGCCTGGGGCAGTG-GGGTG-GTGGTCTGACCCAGGGCTGGGCAGAGGATGAGAAGG |
| FP000529 | GGACTGGCGGAGGCCGCGAGGGAGGGAGCACGAGCGAGGAGGCACGCGCCCGCCGGTCCG-CACCC-GGCCCGCCGCAGCCGCCGCCGCCGTCGCCGTCGCCGCAGCAGCCATGGCCGAGCGCCGCGCCTTCGCCCAGAAGATCAGCAGGTAAATATCCGGCGTGGGGCGCGCCGCCGCCGCCGCCCGAGAAAGAGCCGCGGAGTCCTCCCAGGCCTGGCCTAGGAGGC-GGGTG-GGTGTGGCGGGGCCGGCACCGGGATCCCGCGGCCTGGCTCGCGGCGGGGCGGAAGGGGTTCG-GGGTG-GCTGAGGGGGTAGCGGAGGCCTCGCGCCGCCCTCGAACCCCGGCCTTCAGCCCGCGCCCGCCGCTGAGCCTCGGCAGGGAGCGGAGAGGGCCGCGGACTCCAGCGCGCCCGCCTCCTCCTGCTCCTCGGCGGCCCGGGCCTGGACTTCTGCG |
| FP004135 | GCGGGTCTCCATCCGTGGCGCCTCGCCAGCTGCAGGACGACGCGGGCTCTTGAGGGGCAGAGCAGCGCATCATGCAGGTGAGGGTCGGGACCTGCCGAGC-CACCC-TGGAA-CACCC-AGTGGGTCTCCAGCTGGGCCCGAAGCCAAGGGACACAAATGGGGAGGGCGGACACAGGAGGTAGGCTCTAACATTTGTTCTTGGAAAGTGCTAAATTTTGCGTGCTTCTCTGTCTAGTTTTGAGAAAAATCCTCTAGGAGAACGCCATTTTTTCAGCCTTTAAGACTTGTGTCTGTCGCTGGAGAAAACGTTAAAAGAGTTGTTACGTATTGTGTTTCACACCAAAATCATAGAAATCTTACTGCTGAATACTATTTTTGACTTAATAGAGCGGCAACGTTAGCCCAAGTGTAATTCAATTTGGTTGTCCTCCTCCACTACCTTAAAAAATAAGAA |
| FP017366 | ATTGGTCTCTGTTTTTGTGAATCCCTGTAGGTAGATCTGTCCCCAGGTCTGTGGAACTGTCAGTTGTGAAGTTTTGTAAAATGGT-CACCC-AACTTAAAACTAGGAAATTACGAAGAAGAGAAAATTGCCCTGTATCTGTTAAGGTTGGTGTAAAGGTACAGGGACAGGGGGGCAACTTCGACTAGAGAATTCCATCTCTTCTGTTTTGTCATTTTACCAATTATTCCCATCTGCCC-CACCC-CCTGCTGCTGCTGATTTAGTTGGGAGTCTTGGTAAGTTGTGGGGGTACAGAATGCTAAGCTGCCTTTCCCACTCTCCACTGCTTGTCCTGCTCTCACGCTTGAACCTAGTCTAATCTGAACGAGGGACATTCTAGGGCAATCACTGAAGAGGAAGATGGTGGGCAATAGGAAGGAGGAGGAGGAGTAGCCCTGAAACAAAGCAGTGGGGG |
| FP003318 | GTTCCCCCATCCCAG-CACCC-TCCCTCGCCACCTCGGCCGCGTCCAGAAGCGTCTCATTCAGATAGAGGTACCCAGCCGGGCCCCAGGTCTCACCTGGGTCAGCATTGTCCCGCTGAGAGCTTTCAAACAACAGGTGTACGCGAATCAGTATCAAAAAGCCTCCAGGGAACTGAAAAAAACAGTCTGACTTCCGGGATTCGCGGGCATCCACTTTCATTCTCACGTTTCCTCTTCAATTTCTCGCGAGATACTGATTTGCTCGCGCTATAGAATTCTTGTCGAAGAGGCTTAGCTCCCGCGGGAGATTTCGTGCGCAGTTACTTCCGGTAGCTGGTAAAGGCTGATACTTCCCAGGACGCGGAGGTAACGGGCCAGGGCCAAAGCGACTTTCGCTACTTGGATTGGTCGGCGTAGCTTTGGGCGGCCGGACCTTAGAAAGTCACACATCTGC |
| FP001165 | GTCACAAGGTTCC-CACCC-ACTGGAGTCCCTCCCCGTGTGCCACCAACCAGCACTTTTGTCATGCTGGGAAAACCTCC-CACCC-AGGCCTTTGCCCTGAGTCCAGGGTCTGTGCCCTAACCCCACAGTCACTGAGAGCAACTGGAGGCCACATAAAACAGACATCTCTTGTTTTCCAGATACTACGGGTCATAATCCCTAACTCCAATCACTGGCAACTCCTGAGATCAGAGGAAAACCAGCAACAGCGTGGGAGTTTGGGGAGAGGCATTCCATACCAGATTCTGTGGCCTGCAGGTGACATGCTGCCTAAGAGAAGCAGGTAGGAAATCTGTTGGGGACCAAAGACTAAATGTAATAAAATACAGATAATGCTGGGGGCTAGGCATAGTGGCTCACGTGTGTCATTCCAGCACTTTGGGAGGCCAAGGTGGGGGGATCGCTTGAGCCCAGG |
| FP001272 | TTTTTAAAAAGAAACTCCAAACAGACTTCTGGAAGGTTATTTTCTAAGAATCTTGCTGGCAGCGTGAAGGCAACCCCCCTGTGCACAGCCC-CACCC-AGCCTCACGTGGCCACCTCTGTCTTCCCCCATGAAGGGCTGGCTCCCCAGTATATATAAACCTCTCTGGAGCTCGGGCATGAGCCAGCAAGGC-CACCC-ATCCAGGCACCTCTCAGCACAGCAGAGCTTTCCAGAGGAAGCCTCACCAAGCCTCTGCAATGAGGTTCTTCTGTGCACGTTGCTGCAGCTTTGGGCCTGAGATGCCAGCTGTCCAGCTGCTGCTTCTGGCCTGCCTGGTGTGGGATGTGGGGGCCAGGACAGCTCAGCTCAGGAAGGCCAATGACCAGAGTGGCCGATGCCAGTATACCTTCAGTGTGGCCAGTCCCAATGAATCCAGCTGCCCAGAGCAGAGCCAG |
| FP013976 | CTCGCCCTTCTTGCCCTGCTTTTCTTACTGTGCTCTGTTCCGTCACCACTAGCTCCCCTCCCGCGCGGCTCTGAGTCCCGCTTGCCACTAGTTGCTTCTCGGCAGCCCC-CACCC-CTACGCGTGGTCCGGCCCGGCGGCTGGCGCAGGTTATAAAGGTCCCGCCGCAGCAGCGGACGGCAGACTCGAGATGCGCCCGAAGAGGTTGGGCCGGTGCTGCGCGGGGAGCCGGCTCGGACCCGGGGACCCAGCAGCACTCACCTGTGCACCTTCGCCCTCAGCCAGTCCCGCTCCGGAGCCCTCTGCGCAGCCGCAGGCACGGGGCACTGGACAGAGAGTAGGATCCCGAGCCACCTCTGGATCCCAGTTCCTCTCGGAAGCCCGCACCGGAGCTCGCCCGGCCTCGGAGGCTGGAGCCAAGGCAGGAGCCCGGCGCCCGTCCGCATTCTCGGCC |
| FP017441 | GCTCTCCAGCAGCCCAGCCCTTTCCCAGGGCTGGGGCAGGAGATTGCTACATGTAGGCTTATCTGGGGAAAAACCAGAGCCTCACTTTAGTCCCTTCCGGTAATTGACACTACTGGA-CACCC-AGGAGGGGGAGGAGAGAGCTTCTCTTCATAAATGTTCC-CACCC-CTGGGCAAGGTGGCTCACTCTGGCAGGTAGGAACAGGGGAGAGTGCACCTGCTACCAGTCAAGCTCAGCCAGACTGCAAGAGGAGGCGAGGCGGAGCCAGCCGAGGGAGTGAACCATGGACAAGTTGAAATGCCCGAGTTTCTTCAAGTGCAGGGAGAAGGAGGTAGGGGTCTGGGAGCTGCGGGAGGTGTGGAGGACCTGAGAGTGGAAAACTTAAGGGGGGTTGCTAGTCTCAGTTTTTGCTTTCTGTGGCTGTTCCTTGTGCTCCACATTTCTGTTCAACTAT |
| FP003053 | AGGATTAGAAAGTGGAGCAGCAACCGGAGGCGTCTCTGGGCCGCCCCCCCAACCCCCC-CACCC-CGCCTCGCCCACTC-CACCC-TCACACTGGCGTTGCCACAGTCCCTCCATTCCAGAGGGAATTCCAGAGCGGAATACGGATTCCGATTTTAAAATAAGCGCTTCTAAATCTTTCTCCTTGCATCTAAGAC-GGGTG-GGGGAAAGAAAGGGAGAGGAGTTGAGGTCCCAAGGTTCAAGGCCTGGTGATCTCCAGGTCCCAGGCTGGGCGGCCTCGGTGCACGGAGAGGGCGAGGGGCGTGTTGTGGAGCCTTGGCAAGGCGCTGCTCTTCCTCGCGCCTCGGTTTGCGGTCTGTGAAATGGGGTTGGCAGTGCCTTTGCAGGGACGCGGCGAACTCAAGCACCAGCAAGCGGACTCGAACTCAAAGGGTTTCA-GGGTG-TAGACGACCAGAGC |
| FP002378 | GTGAGCGACGTCCATTT-CACCC-ACCTCGCCGCGACC-CACCC-TGGGATATGTAGTGCGTGACTTCCGCAGTGCACGCTGCGCCTGCCGGGCATTTTTTCCTGGTTTGGGGGCAAGGTCTCATGGGAAAGGTCATGTCTCTCGAAGAAAGGTTATAAACCCTGAGATATGAGGGTTGGGCGAGACATCCGAGCCTGTTTCGTTCCGTGTTGGGACCAGGAATAACCCTGACTTCTGAGCTTTCATAACCCCAGGATCCTCCAGAAAATTTGCGGCGCGCTGAGGGAAAACCTTGCTGGCAAGTCGGGACTGTGTGGCAGCGGCTATTTTTCTTTTCC-CACCC-AGCACGTTTTCGGGCTGGGGACATAGGGTTCAGTTGAGATACGGAGGCTTCCTTCGGGATATTGGGTTCTCTGAAGTGCGGATGGACTAGGGCAGGGCTGAGACCCCATTC |
| FP010292 | CAGGTTCCTTCCTCAGGAAAAGCCAAGGTCAGGCGCAACTTTGCCAAATCCCTGCCCCTCCTTCAGGCTGGAGACAC-CACCC-CCAAACTCACCATGCGGGGAGGGAAGAAGTCTGGTAGGGACTCTTATTGCAACAGGGCCCCAGCCTTATAAAAAGCCCTGGTAACCCGGCCATTACACATCCTGTCTCTGTGTGTGGAGCTGGCTGGAATCTCTCAGCCTCACCTGCCAGACAA-CACCC-CCTCCTTCCT-CACCC-TGTCTCCTGCATTCTCCTGAAACCTTCATCCACACAATGCCTCCCAACCTCACTGGCTACTACCGCTTTGTCTCGCAGAAGAACATGGAGGACTACCTGCAAGCCCTAAGTAATGGCCTCGCCCTCCCAGACCCCTGTCACTCCCTTTCTCCCCTCTTCCTTCCTGCTTCTTGGTCCCATGGAGAAGAGGGAATG |
| FP001502 | CTGTGTGGGGTAGGGCAGGGTCCACACTCCTTCCCATCCATTTTAGAGGAGGAAGCTGGAGTCTGGGAAGGGATGGGATTTTCCCAGGG-CACCC-TGTGAGTCACATGCCACTTGAGACAAGGGTCTAGAGCTCCAGCATTTTCCAAGCTACAAATGTATCTGCTGCTCCAAGTGTCCTAGATCAGGACCCTAGGTAAAGACTTCTGAAAAATACTTGAGTCTAGAAACAGAAAAGAAAAAGGGCTAGTGTGCTCTAGGGGTTTGCACTGTTGTACCCAGTTTGCTTTGCTGTGTCCTAGGAAAGGTCCTTTCTGGGGAT-CACCC-CATTGGCTGAAGATGAGACCATTCTTCCTCTTGTGTTTTGGTAAGTACCCCTTCCCATCCTTCCAGGCCCTGTTATATGGCAGGGAGGCAACAGCCACAGGGAGAAGGAGAGTTTACCAAAGTGTGG |
| FP011777 | TCTGGGCTGAATAGGTGGTCCACTCTGAGTCATCAGCTGT-GGGTG-ATGATGTGGTCACTGCATGATTCTCACACAAG-CACCC-AGAGGACGTCATCAGGCAGAGGCAGTGG-GGGTG-GGCAGCATTTACAGAAAATCTGTGATGAGACACCACAAAACCAGAGGGGAACATGAAGTCACTGAGCCTGCTCCACCTCTTTCCTCTCCCAAGAGCTAAAAGAGAGCAAGGAGGAAACAACAGCAGCTCCAACCAGGGCAGCCTTCCTGAGAAGATGCAACCAATCCTGCTTCTGCTGGCCTTCCTCCTGCTGCCCAGGGCAGATGCAGGTGAGTGACCGTCTC-CACCC-TCGGGGGCCCAACCCCATCCCACAGGTCTCCTGCCCTTTCTCCACATTCCTGATCCATCTATCTACCAGGAATGTTCTGAACTCCAGCTCCCATTCTACCAAGACCC |
| FP010713 | CATACGAATCTAGCCCGGGAACCGAGTTGCGGGAGTGCGGTCTGTGCCGTTCCGGCCAGGAGTTTGCCGACTGCAGACGTCCTGCGAACCGGCAAGATGTGCTCTCTGGGGTTGTTCCCTCCTCCACCGCCTCGGGGTCAAGT-CACCC-TATATGAGCACAATAACGAGCTGGTGACGGGCAGTAGCTATGAGAGCCCGCCCCCCGACTTCCGGGGCCAGGTGGCCAGGGCGAGGAGGGAGGGGACCTACAGGCATGGGGGCGGAGTCGGGGACTACTGGGGAAAGGAGGCAGTGTGACAGGGGCAGGGTCACAGAGTCTGGCGGAGTGGAAACAGCTTGGCCCCGGCAGGAGGCTAGAAGGGCTGGAATCTGTTTTAGGACTGGGATTGGAGTATAACGGGGGAACGGTTAAGGAGCTGTGGAGGAGGCCTAGAGGGAATGGAGAGAATGA |
| FP015337 | AGGTAGGGAGAGAGGAGCTGAGGCCCCAGATCAGCGGCCGCGGGCAAGGTCGCTCAGCGGG-CACCC-GGCCTGGGTATCGGGGCGCGGGTCGGGGGCGGGGCCGGGGCTCAG-GGGTG-GGGCCGGGCCGGGCCGGGCCGGGCGCCTGCGCCATAAAGGCCGCCGCGCGCCCACGCGCCTCGCTTGCTGCGCGCTGCCGGCGCTCCTTCCTCCTCGGCTCGCGTCTCACTCAGTGTACCTTCTAGTCCCGCCATGGCCGCTCT-CACCC-GGGACCCCCAGTTCCAGAAGCTGCAGCAATGGTACCGCGAGCACCGCTCCGAGCTGAACCTGCGCCGCCTCTTCGATGCCAACAAGGACCGCTTCAACCACTTCAGGTGCGGGCGGGCCGGAGGCGGGGGCTGCCACGCGCGGCGCCCGGAACCGGGCACGCGGGCCTGGGGTCTGGAGGCGGGGG |
| FP000316 | GGCCTCCGGGGGAGAAGACTACAGTAAGGGCGAGCAGAGCTGAATGCTTTATGTCGGAATCGACCAATGGGATGGCGG-CACCC-GGTTGCCAGGGCTACGGCCAAGCGGAGGTAGGGCCTCGGCACTATGGGCGGGGCCTGGGCGGGGTTATATAAGCCAGCGGCGGGCGGAAGGCGGGGCGTGGGGGTCTGTGGCTGCTGGGCTGGCGGGGCGCAGGCCGCGGGACCCGAGCCCGGGGAAGCGAGAGAGCGGAGGCGCCGAGGATCCGATTCACTCCCTGGGGAGACCTATGGGCCGAAGCCGTGTAAATGCGTTTTAAGGCGAGTGCGGAAAGTGGCCTGGGGAGCCTCGGGGAGCGGACGCCCTCCGCCCTGGTGCTGACCTGCCTCCCTGCCCCTTCTGCCTCCTGTCAGCAGAGGCCTCGGCTCCGCAACTGCCACTCCTCCTCGGG |
| FP002584 | CCCTCCCCTTGGCTGCTCCCC-CACCC-ATTTCCCGCCTTGTCTTTCCTCTCTTCTCTCTCTCCCTCCTCCCTGCGCGAAGCGGAAGTGACGCGAGGCGTAGCGGAAGTTACTGCAGCCGCGGTGTTGTGCTGTGGGGAAGGGAGAAGGATTTGTAAACCCCGGAGCGAGGTTCTGCTTACCCGAGGCCGCTGCTGTGCGGAGACCCCC-GGGTG-AAGCCACCGTCATCATGTCTGACCAGGTACCGGGCTGGGAGCCATCCAACGGCGGTGGCCAGGGCCTTCCCTGCAGGTCTGCCTGCCGCTAGGCTGGGGTCGGGGATGGAGGCGCGGGGGAGGGGAGCGCGGAATGGGGGAGGGGGCGGCCGGTGGGGACTAGGCAGGCGAGGGAGAGGAGCCGACTACGGCCGGAGGTGCCGGGGCCTGCTGCGGGGCTCCCGGAGCCGCCCGCCCCT |
| FP006713 | GGGCAAGCCTGGCAGGGCAGAGGGAGCCCCGGCTCCGAGGTTGCTCTTCG-CACCC-GAGGATCAGTCTTGGCCCCAAAGCGCGACGCACAAATCCACGTGAGTGTTTTCAAATTGAATTTCAATAGGAAAACTTGGGGTAACTGGTGAATTTAAAAAAAAAAAAACACAGTAAAGAAAAGCGGTAAGGTTGGTAGACCCTGGTGTCGCTCAGGTCCGCCTCTCTTTTCTGAGGACAGTGAGAGAGTTCACTTCTGTCAAGCGTCTGTTGCTCTGCACTGTGCCAGCAGGTGCAGGACCAGGCCGACATGGGACACTTCTGAGCAGCCCCGCTGTCACCAGGAGAGGAGTTCTAGCTCCCAACCATATTTAAATTTATGTAGACCTACATATACCCACGGAAGTCAGCCTTTATAAAGTCGTGTGTAAAGAGTTTTCCTTATATTTGAGCCGG |
| FP016947 | CAGCCAATTAGAGCCCGGCCAGACACCGCGACCCCTCCCCC-CACCC-GCCCCACTCTCGCCCACTGGCGATTGGGTTGCGGGACGCGCGGGGCGGGGCTTCCGGGCGGGGCAGGCTGGCTTCCGGCGGGAGCGGGGCCGCGGATGGCCGTATACAGGGCAGCGCTCGGGGCTTCGCTCGCGGCTGCCCGACTCTTGCCCCTCGGTCGCTGTTCCCCGTCGCCGGCGCCCCGCTCTACGTTGTCGGGCGCCGCCATGGAGCCCGCGCCTCGCTGGCTGGCGGGGCTGCGCTTCGACAACCGCGCCCTGCGCGCCCTGCCCGTGGAGGCGCCGCCGCCCGGTCCCGAGGGCGCCCCGTCCGCGCCGCGGCCCGTGCCCGGGGCCTGCTT-CACCC-GCGTGCAGCC-CACCC-CGCTGCGGCAGCCGCGCCTCGTGGCGCTGTCAGAGCCCGCGCTGG |
