# Supplementary material for: In the Cis-Element CACCC-box a Master Regulatory Element during Cardiovascular Disease? A Bioinformatics Approach from the Perspective of the Kruppel-like Family of Transcription Factors
Source: Preprints.org preprint supplement (doi:10.20944/preprints202403.0607.v1), 2024-03-11
Supplement: Supplementary file 2 [file Supplemental Table 2.docx]

Supplemental Table 2. Transcription factors interactions according to the STRING database. The table shows direct interactions between non-members of the KLF family and their target genes.

| **Transcription factor family** | **Gene** | **Direct interaction** |
| --- | --- | --- |
| SP | SP1 | COL1A1, NR3C1, TBPL1, TBPL2 MYOD1, HBZ, MDM2, EPAS1, ICAM1, LEF1, RB1, NCOR1, MBNL1, FASN, FOS, HCFC1, PRKACA, DHFR2, HNF1A, MEF2C, IL6, DMPK, MTOR, FHL2, TFDP2, NF1, FDFT1, NCOA1, TFAP2A, ESR1 |
| SP | SP2 | FHL2 |
| SP | SP3 | SLC20A1, NF1, SUMO1, DYRK1A, ESR1 |
| SP | SP4 | NRL, GJA5 |
| SP | SP5 | PEX11B |
| SP | SP6 | HHEX, JAZF1, FHL2, CA1, CAMK1D, TCF7L2 |
| *SP | SP7 | ACP5, STUB1, COL1A1, SOX9, CD68, LEF1, FGF18, PLOD2, TNFRSF11B, SOST, FOS, FGF3, MEF2C, DMP1, ADAMTS4, NES, DKK1, IFITM5, IGF1, MEPE, CCK, IL6, ACAN, CD44, FGF16, ESR1, DLX5 |
| SP | SP8 | PVALB, LEF1, GAD1, BAG3, TBR1, LHX6, DLX5, ENO1, PAX6 |
| SP | SP9 | LHX6 |
| WT | WT1 | IL2, IFNG, MLH1, FLT3, SOX9, MYOD1, KRT5, THAP1, MDM2, SULF1, PAX8, EPCAM, LEF1, STAR, ATM, WNT9B, RAD21, MN1, TBX5, NKX2-5, GATA2, NF1, NUP214, RBMX, NFIA, CSF3R, AMER1, VIM, PBX1, TNNT2, CD44, FBXW7, PMEL, CITED1, CD8A, MYH11, IDH1, ESR1, PAX6, IGF2, TET2 |
| PATZ | PATZ1 | SNRPC, ESR1, CD8A, NR4A3, NCOR1 |
| SALL4 | SALL4 | TBX3, LEFTY2, ADAMTS18, SOX15, TBR1, EPCAM, PAX8, ALPP, GJA5, KDM2B, EPAS1, TET2, TBX6, PBX1, EED, NKX2-5, TBX5 |
